# Supplementary material
Source: publisher figshare collection journal article supplement (https://tandf.figshare.com/articles/dataset/_/19611360)
Supplement: Supplementary file 1 [file 2]

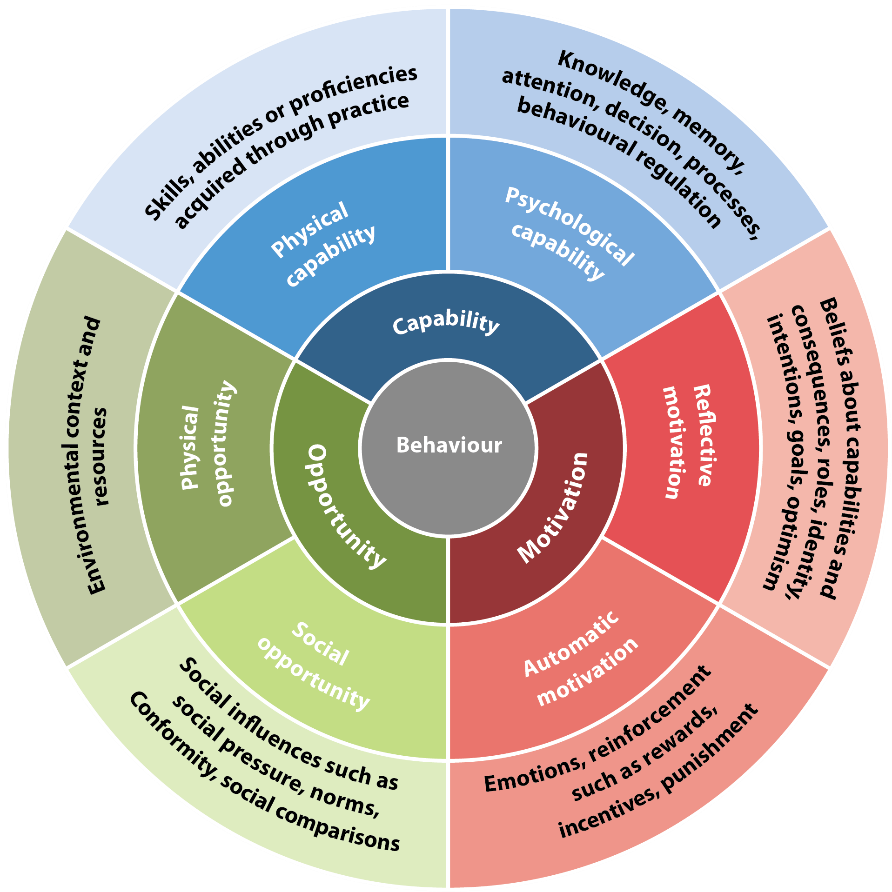


Supplementary Figure 1. COM-B model of behaviour change, a framework for identifying barriers and facilitates to health behaviour. Adapted from “Application of the COM-B model to barriers and facilitators to chlamydia testing in general practice for young people and primary care practitioners: a systematic review,” by L.K. McDonagh et al., 2018, Implementation Science, 13, p. 3 ([https://doi.org/10.1186/s13012-018-0821-y](https://urldefense.proofpoint.com/v2/url?u=https-3A__doi.org_10.1186_s13012-2D018-2D0821-2Dy&d=DwMFAg&c=vh6FgFnduejNhPPD0fl_yRaSfZy8CWbWnIf4XJhSqx8&r=mUNpGR_1TZK_P0GEJO7mw9ZtzqxmulmlqdaL1HKTj5M&m=DXP-F3te1P6wUFq3S33gmBg3B9M2fWiOMAjSnnQD9YUUb2hUUsW_-C8cp4wYBFWH&s=WEZ9w8_iMu-_pBM69C9C8GV9cIoN1_AaBZk6teAu3M0&e=)). Copyright 2018 by BMC.
